# Supplementary material for: Associations between Lifestyle Factors and Vitamin E Metabolites in the General Population
Source: MDPI journal article supplement (doi:10.3390/antiox9121280), 2020-12-15
Supplement: s1 [file s1]

## Supplementary tables

**Table S1 Associations between alcohol use and different measurements of vitamin E activity.**

| Lifestyle factors    | $\alpha$ -TOH |          |         | Total TLHQ |           | Total CEHC |           | Ratio TLHQ/CEHC |           |
|----------------------|---------------|----------|---------|------------|-----------|------------|-----------|-----------------|-----------|
|                      | N =           | % change | 95% CI  | % change   | 95% CI    | % change   | 95% CI    | % change        | 95% CI    |
| Alcohol use in g/day |               |          |         |            |           |            |           |                 |           |
| 1.0–2.49 g/day       |               |          |         |            |           |            |           |                 |           |
| All                  | 132           | Ref      | Ref     | Ref        | Ref       | Ref        | Ref       | Ref             | Ref       |
| Men                  | 40            | Ref      | Ref     | Ref        | Ref       | Ref        | Ref       | Ref             | Ref       |
| Women                | 92            | Ref      | Ref     | Ref        | Ref       | Ref        | Ref       | Ref             | Ref       |
| 2.5–9.2 g/day        |               |          |         |            |           |            |           |                 |           |
| All                  | 133           | –2       | –5 to 2 | –8         | –19 to 6  | –1         | –16 to 16 | –8              | –18 to 4  |
| Male                 | 48            | –2       | –8 to 3 | –4         | –24 to 19 | 13         | –14 to 49 | –16             | –33 to 5  |
| Female               | 85            | –2       | –6 to 3 | –10        | –24 to 7  | –9         | –25 to 12 | –2              | –15 to 13 |
| 9.2–21.5 g/day       |               |          |         |            |           |            |           |                 |           |
| All                  | 133           | –0       | –3 to 4 | –9         | –21 to 4  | 2          | –14 to 20 | –12             | –22 to 0  |
| Male                 | 63            | –1       | –6 to 5 | 2          | –17 to 26 | 16         | –10 to 51 | –13             | –29 to 8  |
| Female               | 70            | 1        | –4 to 6 | –16        | –30 to 2  | –6         | –25 to 18 | –11             | –24 to 5  |
| 21.5–171.6 g/day     |               |          |         |            |           |            |           |                 |           |
| All                  | 132           | 3        | –1 to 7 | –17        | –28 to –4 | –4         | –20 to 14 | –13             | –24 to –1 |
| Male                 | 95            | 3        | –3 to 8 | –7         | –24 to 14 | 7          | –17 to 39 | –13             | –29 to 17 |
| Female               | 37            | 2        | –4 to 8 | –27        | –42 to –9 | –11        | –32 to 16 | –19             | –33 to –2 |

Results are derived from linear regression model adjusted for age, sex (in analysis for all participants only), BMI and smoking with 95% confidence interval (CI) and presented as percentage difference compared with the reference group. All analysis done with  $\alpha$  -TOH were adjusted for LDL levels.  $\alpha$  -TOH,  $\alpha$  -Tocopherol; TLHQ, tocopheronolactone hydroquinone; CEHC, carboxymethyl-hydroxychroman.

Table S2 Associations between sleep quality, physical activity and different measurements of vitamin E activity.

| Lifestyle factors | <u><math>\alpha</math>-TOH</u> |          |         | <u>Total TLHQ</u> |           | <u>Total CEHC</u> |           | <u>Ratio TLHQ/CEHC</u> |           |
|-------------------|--------------------------------|----------|---------|-------------------|-----------|-------------------|-----------|------------------------|-----------|
|                   | N =                            | % change | 95% CI  | % change          | 95% CI    | % change          | 95% CI    | % change               | 95% CI    |
| Sleep quality     |                                |          |         |                   |           |                   |           |                        |           |
| Good Quality      |                                |          |         |                   |           |                   |           |                        |           |
| All               | 288                            | Ref      | Ref     | Ref               | Ref       | Ref               | Ref       | Ref                    | Ref       |
| Male              | 158                            | Ref      | Ref     | Ref               | Ref       | Ref               | Ref       | Ref                    | Ref       |
| Female            | 130                            | Ref      | Ref     | Ref               | Ref       | Ref               | Ref       | Ref                    | Ref       |
| Poor Quality      |                                |          |         |                   |           |                   |           |                        |           |
| All               | 205                            | 3        | 1 to 6  | 0                 | -10 to 10 | -0                | -12 to 13 | 1                      | -9 to 9   |
| Male              | 76                             | 5        | 1 to 9  | 6                 | -8 to 23  | -2                | -18 to 17 | 9                      | -6 to 25  |
| Female            | 129                            | 2        | -1 to 6 | -6                | -19 to 8  | -0                | -15 to 18 | 7                      | -17 to 4  |
| PA in MET-h/wk    |                                |          |         |                   |           |                   |           |                        |           |
| PA 0–16.3         |                                |          |         |                   |           |                   |           |                        |           |
| All               | 129                            | Ref      | Ref     | Ref               | Ref       | Ref               | Ref       | Ref                    | Ref       |
| Male              | 61                             | Ref      | Ref     | Ref               | Ref       | Ref               | Ref       | Ref                    | Ref       |
| Female            | 68                             | Ref      | Ref     | Ref               | Ref       | Ref               | Ref       | Ref                    | Ref       |
| PA 16.5–29.8      |                                |          |         |                   |           |                   |           |                        |           |
| All               | 130                            | 1        | -2 to 5 | -7                | -18 to 7  | 11                | -5 to 31  | -17                    | -26 to -6 |
| Male              | 59                             | -1       | -5 to 4 | -7                | -23 to 12 | 18                | -7 to 50  | -22                    | -35 to -6 |
| Female            | 71                             | 3        | -2 to 9 | -8                | -24 to 11 | 5                 | -16 to 31 | -13                    | -26 to 1  |
| PA 30.0–49.5      |                                |          |         |                   |           |                   |           |                        |           |
| All               | 132                            | -1       | -4 to 3 | -11               | -22 to 2  | 0                 | -14 to 18 | -12                    | -22 to -1 |
| Male              | 60                             | -2       | -7 to 3 | -11               | -26 to 8  | 1                 | -19 to 28 | -12                    | -27 to 5  |
| Female            | 72                             | -0       | -5 to 5 | -12               | -28 to 7  | -3                | -23 to 21 | -11                    | -24 to 5  |

|               |     |    |           |    |           |    |           |     |           |
|---------------|-----|----|-----------|----|-----------|----|-----------|-----|-----------|
| PA 49.8–242.5 |     |    |           |    |           |    |           |     |           |
| All           | 130 | –2 | –6 to 1   | –5 | –17 to 14 | 4  | –11 to 23 | –9  | –19 to 3  |
| Male          | 63  | –5 | –10 to –0 | –6 | –22 to 14 | 15 | –9 to 45  | –17 | –31 to –1 |
| Female        | 67  | –0 | –5 to 6   | –6 | 23 to 14  | –6 | –25 to 18 | –2  | –16 to 15 |

Results are derived from linear regression model adjusted for age, sex (in analysis for all participants only), BMI or TBF with 95% confidence interval (CI) and presented as percentage difference compared with the reference group. Analysis on sleep quality was additionally adjusted for smoking. PA was additionally adjusted for smoking and alcohol. All analysis done with  $\alpha$ -TOH were adjusted for LDL levels. PA, Physical Activity;  $\alpha$ -TOH,  $\alpha$ -tocopherol; TLHQ, tocopheronolactone hydroquinone; CEHC, carboxymethyl-hydroxychroman.

**Table S3 Associations between smoking, diet quality and different measurements of vitamin E activity.**

| Lifestyle factors | <u><math>\alpha</math>-TOH</u> |          |          | <u>Total TLHQ</u> |           | <u>Total CEHC</u> |            | <u>Ratio TLHQ/CEHC</u> |           |
|-------------------|--------------------------------|----------|----------|-------------------|-----------|-------------------|------------|------------------------|-----------|
|                   | N =                            | % change | 95% CI   | % change          | 95% CI    | % change          | 95% CI     | % change               | 95% CI    |
| Smoking           |                                |          |          |                   |           |                   |            |                        |           |
| Nonsmokers        |                                |          |          |                   |           |                   |            |                        |           |
| All               | 216                            | Ref      | Ref      | Ref               | Ref       | Ref               | Ref        | Ref                    | Ref       |
| Male              | 92                             | Ref      | Ref      | Ref               | Ref       | Ref               | Ref        | Ref                    | Ref       |
| Female            | 124                            | Ref      | Ref      | Ref               | Ref       | Ref               | Ref        | Ref                    | Ref       |
| Former smokers    |                                |          |          |                   |           |                   |            |                        |           |
| All               | 255                            | –1       | –4 to 2  | 4                 | –6 to 15  | 2                 | –10 to 15  | 2                      | –7 to 12  |
| Male              | 124                            | –0       | –4 to 4  | 2                 | –12 to 18 | –6                | –22 to 13  | 8                      | –7 to 25  |
| Female            | 131                            | –2       | –6 to 2  | 6                 | –8 to 23  | 8                 | –9 to 28   | –1                     | –12 to 11 |
| Current smokers   |                                |          |          |                   |           |                   |            |                        |           |
| All               | 59                             | –4       | –8 to 0  | –11               | –24 to 5  | –32               | –44 to –18 | 32                     | 14 to 53  |
| Male              | 30                             | –4       | –9 to 2  | 2                 | –18 to 28 | –27               | –45 to –3  | 39                     | 12 to 74  |
| Female            | 29                             | –5       | –11 to 1 | –21               | –38 to 0  | –39               | –54 to –19 | 28                     | 6 to 56   |
| DHDI              |                                |          |          |                   |           |                   |            |                        |           |
| Score 25.4–61.5   |                                |          |          |                   |           |                   |            |                        |           |

|                  |     |     |         |     |           |     |           |     |           |
|------------------|-----|-----|---------|-----|-----------|-----|-----------|-----|-----------|
| All              | 132 | Ref | Ref     | Ref | Ref       | Ref | Ref       | Ref | Ref       |
| Male             | 75  | Ref | Ref     | Ref | Ref       | Ref | Ref       | Ref | Ref       |
| Female           | 57  | Ref | Ref     | Ref | Ref       | Ref | Ref       | Ref | Ref       |
| Score 61.9–72.5  |     |     |         |     |           |     |           |     |           |
| All              | 133 | –2  | –3 to 4 | 0   | –13 to 15 | 6   | –10 to 25 | –7  | –18 to 4  |
| Male             | 72  | 2   | –3 to 7 | 2   | –15 to 22 | 7   | –14 to 34 | –6  | –21 to 12 |
| Female           | 61  | –2  | –7 to 4 | 2   | –17 to 26 | 8   | –16 to 38 | –6  | 21 to 12  |
| Score 72.5–81.5  |     |     |         |     |           |     |           |     |           |
| All              | 133 | 1   | –2 to 5 | 13  | –2 to 29  | 6   | –10 to 25 | 5   | –7 to 18  |
| Male             | 62  | –1  | –5 to 4 | 6   | –12 to 27 | 0   | –20 to 26 | 4   | –13 to 24 |
| Female           | 71  | 3   | –2 to 9 | 22  | –1 to 49  | 12  | –12 to 43 | 7   | –10 to 26 |
| Score 81.6–117.8 |     |     |         |     |           |     |           |     |           |
| All              | 132 | 3   | –1 to 7 | 12  | –3 to 29  | 10  | –7 to 31  | –1  | –13 to 12 |
| Male             | 37  | 2   | –3 to 8 | 12  | –10 to 39 | 18  | –10 to 55 | 8   | –25 to 14 |
| Female           | 95  | 3   | –2 to 9 | 15  | – to 40   | 9   | –13 to 37 | 3   | –12 to 21 |

Results are derived from linear regression model adjusted for age, sex (in analysis for all participants only), BMI or TBF with 95% confidence interval (CI) and presented as percentage difference compared with the reference group. Analysis on smoking were additionally adjusted for alcohol use. Diet quality, was additionally adjusted for smoking. All analysis done with  $\alpha$  -TOH were adjusted for LDL levels. DHDI, Dutch Healthy Diet Index;  $\alpha$  -TOH,  $\alpha$  -tocopherol; TLHQ, tocopheronolactone hydroquinone; CEHC, carboxymethyl-hydroxychroman.

**Table S4 Associations between smoking intensity in current smokers and different measurements of vitamin E activity.**

| Smoking intensity in current smokers | <u><math>\alpha</math> -TOH</u> |          |         | <u>Total TLHQ</u> |           | <u>Total CEHC</u> |           | <u>Ratio TLHQ/CEHC</u> |           |
|--------------------------------------|---------------------------------|----------|---------|-------------------|-----------|-------------------|-----------|------------------------|-----------|
|                                      | N =                             | % change | 95% CI  | % change          | 95% CI    | % change          | 95% CI    | % change               | 95% CI    |
| Smoking packyears 0.6-16.67          |                                 |          |         |                   |           |                   |           |                        |           |
| All                                  |                                 |          |         |                   |           |                   |           |                        |           |
| Male                                 | 29                              | –3       | –9 to 3 | –7                | –26 to 17 | –25               | –43 to –2 | 24                     | 2 to 52   |
| Female                               | 11                              | –1       | –9 to 8 | 21                | –14 to 70 | –5                | –37 to 44 | 27                     | –10 to 78 |

|                              |    |     |           |     |           |     |            |    |           |
|------------------------------|----|-----|-----------|-----|-----------|-----|------------|----|-----------|
| Smoking packyears 18.1–100.5 | 18 | –5  | –12 to 4  | –18 | –40 to 12 | –35 | –55 to –6  | 26 | –3 to 62  |
| All                          |    |     |           |     |           |     |            |    |           |
| Male                         | 30 | –9  | –15 to –3 | –16 | –34 to 6  | –46 | –59 to –28 | 55 | 25 to 93  |
| Female                       | 19 | –10 | –17 to –3 | –13 | –37 to 20 | –50 | –66 to –26 | 73 | 27 to 137 |
|                              | 11 | –9  | –18 to 2  | –27 | –50 to 7  | –45 | –65 to –14 | 33 | –3 to 83  |

Results are derived from linear regression model adjusted for age, sex (in analysis for all participants only), BMI or TBF and alcohol use with 95% confidence interval (CI) and presented as percentage difference compared with the reference group. All analysis done with  $\alpha$ -TOH were adjusted for LDL levels.  $\alpha$ -TOH,  $\alpha$ -tocopherol; TLHQ, tocopheronolactone hydroquinone; CEHC, carboxymethyl-hydroxychroman.
